# Supplementary material
Source: Springer Nature journal article supplement (https://www.springermedizin.de/resource/supplementary/12885_2004_155_MOESM1_ESM.pdf/9469030)
Supplement: MOESM1 [file 9469030]

**Additional file 1, The target promoter CpG islands and the primers for MSP**

| Gene Name                | GeneBank No. | Sense 5'-3'                | Antisense 5'-3'            | Amplicon ligation relative to transcription start | Size (bp) |
|--------------------------|--------------|----------------------------|----------------------------|---------------------------------------------------|-----------|
| ABL (M)                  | U07563       | CGAGGATCGTTATTTGGTTCG      | TAACCGAAAACCGCCTATTA       | -368 to -172                                      | 197       |
| ABL (U)                  |              | TTGTTATTTGGTTTGGGTTGG      | TAACCCACAACCACATCTCCAC     | -362 to -150                                      | 213       |
| APAF1 (M)                | AB070829     | AGGTTTAGTTACGTTTCGTTTCG    | CGTCCACTCGCTACCTCTTC       | -348 to -99                                       | 217       |
| APAF1 (U)                |              | GAGGTTTAGTTAAGTTTGTGTGG    | CCACTCACTACCTCTCTCTCC      | -348 to -102                                      | 215       |
| APC (M)                  | U02509       | TATTGCGGAGTCCGGGTC         | TCGACGAATCCCGACGA          | -17147 to -17050                                  | 97        |
| APC (U)                  |              | GTGTTTTATTTGGAGTTGGGGT     | CCAATCAACAACTCCCAACAA      | -17153 to -17046                                  | 108       |
| AR (M)                   | M58158       | TTTCGAGATTTCCGGGAG         | ACAACCTCCGAAACGACGAC       | -3 to +210                                        | 214       |
| AR (U)                   |              | TTTGTAGATTTTGGGGAGTTAG     | CCAAACAACAACCTCAAAACCA     | -3 to +204                                        | 208       |
| BRCA1 (M)                | L78833       | GGTTAATTTAGAGTTTCGAGAGACG  | TCAACGAACCTCACGGCGCAATCG   | -320 to -138                                      | 182       |
| BRCA1 (U)                |              | GGTTAATTTAGAGTTTTCGAGAGATG | TCAACAAACTCACACACAAATCA    | -320 to -138                                      | 182       |
| CAV (M)                  | NT_007933    | TTAGGGCGAGAGCGATTTC        | GCCGCCAAAATCAAAAAC         | +1320 to +1482                                    | 163       |
| CAV (U)                  |              | AGTGTTTAGGGTTCGAGTATTG     | CCACCCACCACAAAAT           | +1315 to +1488                                    | 174       |
| CDH1 (M)                 | L34545       | GTTGGCGGGTTCGTTAGTTTC      | CTCACAATACTTTACAATCCGACG   | -265 to -93                                       | 172       |
| CDH1 (U)                 |              | GGTGGGTGGGTTGTAGTTTGT      | AACCTACAATACTTTACAATCCAAC  | -266 to -93                                       | 172       |
| CDH13 (M)                | AB001090     | TCGCGGGGTTTCGTTTTCGC       | GACGTTTTCATTATACACCGG      | -267 to -24                                       | 243       |
| CDH13 (U)                |              | TTGTGGGGTTTGTTTTTGT        | AACCTTTCATTATACACACA       | -267 to -24                                       | 243       |
| CSPG2(M)                 | AC026696     | AGTTTCGGGGGACGTTT          | TTTCTACCCCGCTCTCC          | +1350 to +1525                                    | 176       |
| CSPG2(U)                 |              | GAGTTTTCGGGGAGTTT          | AACCAACCAACCACTCCA         | +1349 to +1500                                    | 152       |
| eyelin a1 (M)            | AF124143     | TCGTCGGGTTTAGTCGT          | ACCCTGTTCCCAACAAC          | -755 to -550                                      | 206       |
| eyelin a1 (U)            |              | GGGTAGTTTGTGTGTTTAGTTG     | AACCACTAACAACCCCTCT        | -762 to -565                                      | 199       |
| DAPK1 (M)                | NM_004938    | GGATAGTCGGATCGAGTTAACGTC   | CCCTCCAAACGCCGA            | -332 to -234                                      | 98        |
| DAPK1 (U)                |              | GGATAGTTGGATTGAGTTAATGTC   | CAAACTCCCTCCAAACACAA       | -332 to -229                                      | 103       |
| DBCCR1 (M)               | AL138894     | CGGGTGTAGCGTTTCGTA         | CAAAAACCCCTCCCTAA          | +396 to +561                                      | 166       |
| DBCCR1(U)                |              | GGTGTGTTGGGTTGATG          | CAAAAACCCCTCCCTAA          | +388 to +561                                      | 174       |
| EPO (M)                  | NT_007933    | TTACGTTTCGGCGAGTT          | CGAACGACCGAAAATAACC        | -212 to -28                                       | 185       |
| EPO (U)                  |              | TTTGTTTATGTTTGGTTCGAGTTTA  | ACCCCAATCCAACCTCAA         | -217 to +17                                       | 236       |
| hMLH1 (M)                | AB017806     | ACGTAGACGTTTATAGGGTCGC     | CCTCATCGTAATACCCCGG        | -531 to -655                                      | 124       |
| hMLH1 (U)                |              | TTTGTAGTTAGATGTTTATAGGGTGT | ACCACCTCATATAACTCCACA      | -526 to -654                                      | 118       |
| IRF 7(M)                 | NT_008953.8  | GTTTCGGGAGTTGAGAATC        | TATAACCTGACGGCGACAC        | +161 to +356                                      | 196       |
| IRF 7 (U)                |              | GGTGGGGTTTGTGGAGT          | TACAAATATAACCAACACACACAT   | +155 to +362                                      | 208       |
| LKB1 (M)                 | XM_012913    | GGTGTTCGTCGGTTCGTA         | TTCCGACTTCCCTCTCC          | -253 to -68                                       | 168       |
| LKB1(U)                  |              | TTTGTGTTTGTGTGTTTGTGA      | TATATCCAACCTCCCTCTCC       | -238 to -64                                       | 175       |
| MAGEA1 (M)               | U82670       | GTTTCGGTCGAAGGAATTTGA      | CCACAACCTCCCTCTTAAA        | +24 to +345                                       | 322       |
| MAGEA1 (U)               |              | GTTTGGTTGAAGGAATTTGA       | ACCACAACCTCCCTCTTAA        | +24 to +347                                       | 324       |
| MGMT(M)                  | AL355531     | AGCGTCGTTGTTTGTGC          | CGCTTCAAAAACCACTCG         | -451 to -266                                      | 186       |
| MGMT(U)                  |              | TTGTAGTGTGTTGTTTGTGT       | CATCTACAACCCCCACA          | -469 to -261                                      | 209       |
| MT1A (M)                 | K01383       | TAAGGTTGGGTTTCGGAAC        | AAATACGACACCAGAAAACCA      | -421 to -258                                      | 164       |
| MT1A (U)                 |              | TAAGGTTGGGTTTTCGGAAT       | CTCCCTAATAACAAAACACA       | -421 to -251                                      | 171       |
| MYOD1 (M)                | AF027148     | GACGTTTTCGACGGT            | GCCCGAAAACCGAATACAC        | +210 to +393                                      | 184       |
| MYOD1 (U)                |              | ATTGTAGTGGTTTGTGATGGTT     | CACACACATACTCATCTCACA      | +206 to +418                                      | 213       |
| OCT6 (M)                 | L26494       | ACGAGGATCGGTTAGTTCG        | GAATCGATCTCTCCAACCA        | +727 to +955                                      | 229       |
| OCT6 (U)                 |              | GGATGAGGATGTTGTTAGTTG      | TCAATCTCTCCAACCACTT        | +725 to +952                                      | 228       |
| p14 <sup>ARF</sup> (M)   | L41934       | GTCGAGTTCGGTTTGGAGG        | AAAACCAACAACGACGAAACG      | +95 to +255                                       | 160       |
| p14 <sup>ARF</sup> (U)   |              | TGAGTTTGGTTTTGGAGGTGG      | AACCAACAACAACCAACCCCT      | +97 to +262                                       | 165       |
| p15 <sup>INK4b</sup> (M) | NM_004936    | CGCTTCGATTTTCGCGTT         | CGTACAATAACCGAACGACCGA     | -312 to -165                                      | 147       |
| p15 <sup>INK4b</sup> (U) |              | TGTGATGTTGTTGATTTTGGGTT    | CCATAAATAACCAACCAACCA      | -318 to -164                                      | 154       |
| p16 <sup>INK4a</sup> (M) | NM_000077    | TTATTAGAGGTTGGGCGGATCGC    | ACCCCGAACCCGACCGTAA        | -80 to +69                                        | 149       |
| p16 <sup>INK4a</sup> (U) |              | TTATTAGAGGGTGGGGTGGATTGT   | CAACCCCAACCAACCAATAA       | -80 to +71                                        | 151       |
| p27 <sup>KIP1</sup> (M)  | AB003688     | CGACGTCGGTAAGGTTG          | AAACGCGCAAAAACCTACG        | -355 to -163                                      | 193       |
| p27 <sup>KIP1</sup> (U)  |              | TGTGATTTGATGTTGGTAAGGT     | CAAAACCAACCCAACTCT         | -363 to -141                                      | 223       |
| p53 <sup>KIP2</sup> (M)  | HSU48869     | GGGTCGCGGCTATAAA           | ATACGAAAAACGGACGA          | -70 to +118                                       | 205       |
| p53 <sup>KIP2</sup> (U)  |              | GGGTGGGGTTTGTGTGAT         | AAACACAACAACCTACCTAACTTCCA | -79 to +111                                       | 203       |
| p73 (M)                  | AB031234     | GCGTTCGGTTCGTAGGT          | CTCAACTCCAAAACCCAA         | -1722 to -1511                                    | 212       |
| p73 (U)                  |              | TGGGTGTTGGTTGTAGGT         | CCAATCTCAACTCCAAA          | -1725 to -1505                                    | 221       |
| PTEN (M)                 | NM_000314    | GGTTTTTCGAGCGCTTCG         | CGCTCACAACCTCAACT          | -978 to -786                                      | 192       |
| PTEN (U)                 |              | TGGTTTTTTGAGGTGTTG         | TTCCATCATAACTACAACCTCCA    | -979 to -812                                      | 167       |
| RASSF1A (M)              | XM_040961    | GTTGTTAACGCGTTCGCTATC      | AAACCCCGGAACATAAAAACGA     | +82 to +176                                       | 94        |
| RASSF1A(U)               |              | TTTGGTTGGAGTGTGTAATGTG     | CAAAACCCCAACAATAAAAACAA    | +70 to +178                                       | 108       |
| RASSF1C(M)               | NT_006014.7  | AGTTGGATTGTCGGTTTCG        | TCAAAAACCCCACTACCAC        | -370 to -137                                      | 187       |
| RASSF1C(U)               |              | GGAGTTTGGATTGTTGGTTTGG     | CACCCCAAAAATAACCTCAT       | -370 to -137                                      | 187       |
| RBI (M)                  | L11910       | GGGAGTTTCGCGGACGTGAC       | ACGTGGAACACGCCCGG          | -90 to 74                                         | 163       |
| RBI (U)                  |              | GGGAGTTTTCGTTGATGTGAT      | ACATCAAAAACACACCCCA        | -90 to 74                                         | 163       |
| SURVIVIN (M)             | U75285       | GCGCGGAGGATATAAATTTTCG     | CCGCCACCTCTACCAACG         | -171 to -7                                        | 163       |
| SURVIVIN (U)             |              | GGTGGGAGGATATAAATTTTTCG    | CCACCAACCAACCTCTAC         | -171 to -7                                        | 163       |
| VHL (M)                  | AF010238     | TGGAGGATTTTTTTCGGTACCG     | GAACCGAAGCCCGCGGAA         | -183 to -25                                       | 158       |
| VHL (U)                  |              | GTTGGAGGATTTTTTGTGATGT     | CCAAAACCAACCAACCAAA        | -185 to -20                                       | 165       |
| WT1(M)                   | X74840       | GTTAGGCGTCGTCGAGGTTA       | AAAACGCAAAAATCAACACC       | +321 to +526                                      | 206       |
| WT1 (U)                  |              | TGGGATTTGGTGGTATTG         | CACCAACACCACTACACCA        | +295 to +510                                      | 216       |
